# Supplementary material for: Synthesis and Characterization of Selenium Nanoparticles-Lysozyme Nanohybrid System with Synergistic Antibacterial Properties
Source: PubMed Central journal article supplement (PMC6965607; doi:10.1038/s41598-019-57333-7), 2020-01-16
Supplement: 41598_2019_57333_MOESM1_ESM.pdf [file 41598_2019_57333_MOESM1_ESM.pdf]

## **Supplementary Figures**

### **Synthesis and Characterization of Selenium Nanoparticles-Lysozyme Nanohybrid System with Synergistic Antibacterial Properties**

Mahsa Vahdati<sup>1</sup>, Tahereh Tohidi Moghadam<sup>2\*</sup>

1. Department of Biology, Science and Research Branch, Islamic Azad University

2. Department of Nanobiotechnology, Faculty of Biological Sciences, Tarbiat Modares University

\*Corresponding Author: [t.tohidi@modares.ac.ir](mailto:t.tohidi@modares.ac.ir)

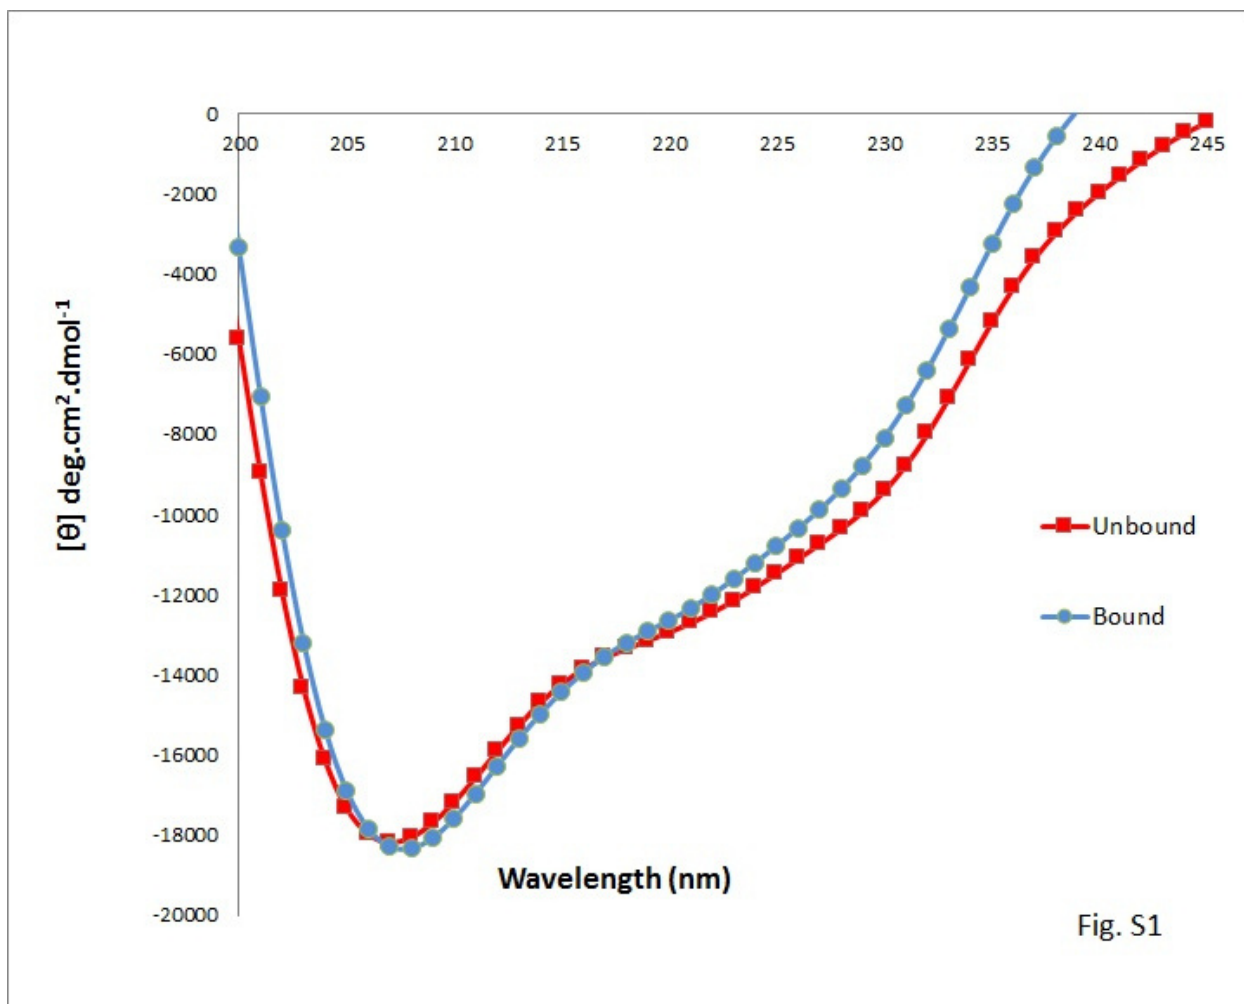

Fig. S1

**Fig. S1.** Comparison of Circular dichroism spectropolarimetry of lysozyme in untreated and bound from (present in the purified nano hybrid samples). Final concentration of SeNPs in the hybrid system is  $40 \mu\text{g. mL}^{-1}$ .

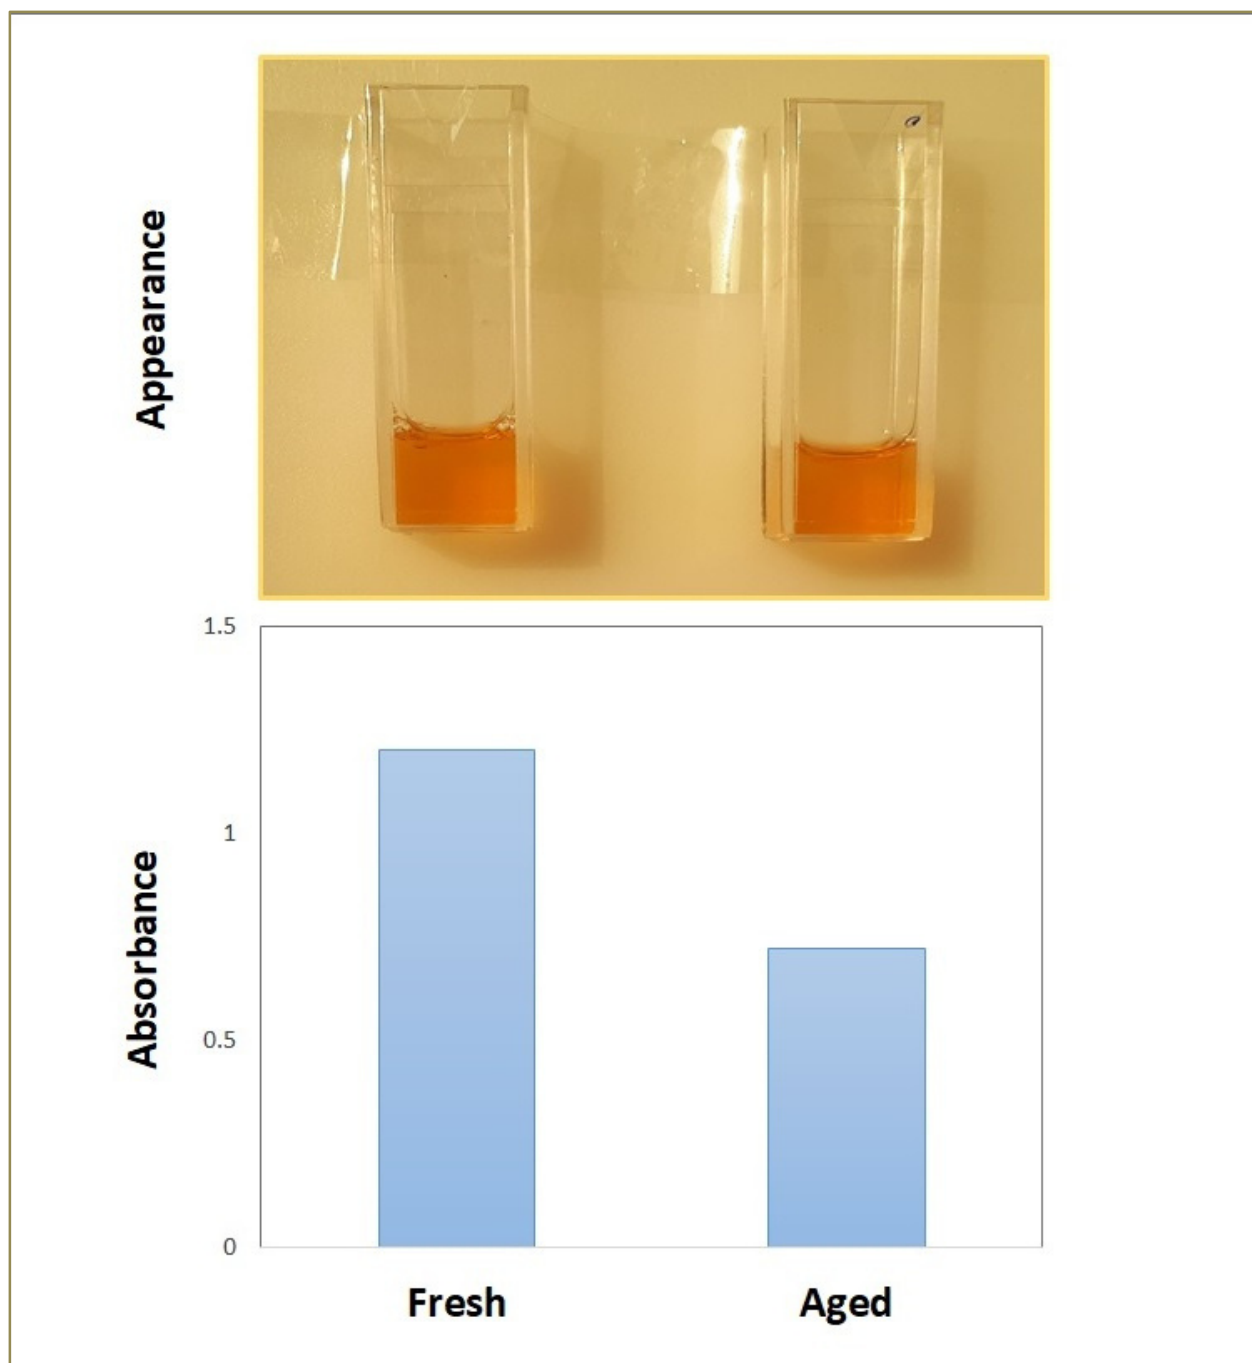

**Fig. S2.** Appearance and absorbance of the aged nanohybrid system at 265 nm, after six weeks of storage under refrigerated condition.
